- stromal cells turn activated macrophages into a regulatory-like profile. *PLoS One* 2010; 5:e9252
152. Gregory CA, Ylostalo J, Prockop DJ: Adult bone marrow stem/progenitor cells (MSCs) are preconditioned by micro-environmental “niches” in culture: A two-stage hypothesis for regulation of MSC fate. *Sci STKE* 2005; 2005:pe37
  153. Eliopoulos N, Stagg J, Lejeune L, Pommey S, Galipeau J: Allogeneic marrow stromal cells are immune rejected by MHC class I- and class II-mismatched recipient mice. *Blood* 2005; 106:4057–65
  154. National Institutes of Health. *ClinicalTrials.gov*. Available at: <https://clinicaltrials.gov>. Accessed July 19, 2017.
  155. Prescott HC, Calfee CS, Thompson BT, Angus DC, Liu VX: Toward smarter lumping and smarter splitting: Rethinking strategies for sepsis and acute respiratory distress syndrome clinical trial design. *Am J Respir Crit Care Med* 2016; 194:147–55
  156. Man M, Close SL, Shaw AD, Bernard GR, Douglas IS, Kaner RJ, Payen D, Vincent JL, Fossceco S, Janes JM, Leishman AG, O'Brien L, Williams MD, Garcia JG: Beyond single-marker analyses: Mining whole genome scans for insights into treatment responses in severe sepsis. *Pharmacogenomics J* 2013; 13:218–26
  157. Ranieri VM, Thompson BT, Barie PS, Dhainaut JF, Douglas IS, Finfer S, Gårdlund B, Marshall JC, Rhodes A, Artigas A, Payen D, Tenhunen J, Al-Khalidi HR, Thompson V, Janes J, Macias WL, Vangerow B, Williams MD; PROWESS-SHOCK Study Group: Drotrecogin alfa (activated) in adults with septic shock. *N Engl J Med* 2012; 366:2055–64
  158. Wong HR, Cvijanovich N, Lin R, Allen GL, Thomas NJ, Willson DF, Freishtat RJ, Anas N, Meyer K, Checchia PA, Monaco M, Odom K, Shanley TP: Identification of pediatric septic shock subclasses based on genome-wide expression profiling. *BMC Med* 2009; 7:34

## ANESTHESIOLOGY REFLECTIONS FROM THE WOOD LIBRARY-MUSEUM

### A “Dopeless” Diamond Belied Koca Nola’s Cocaine-laced Content

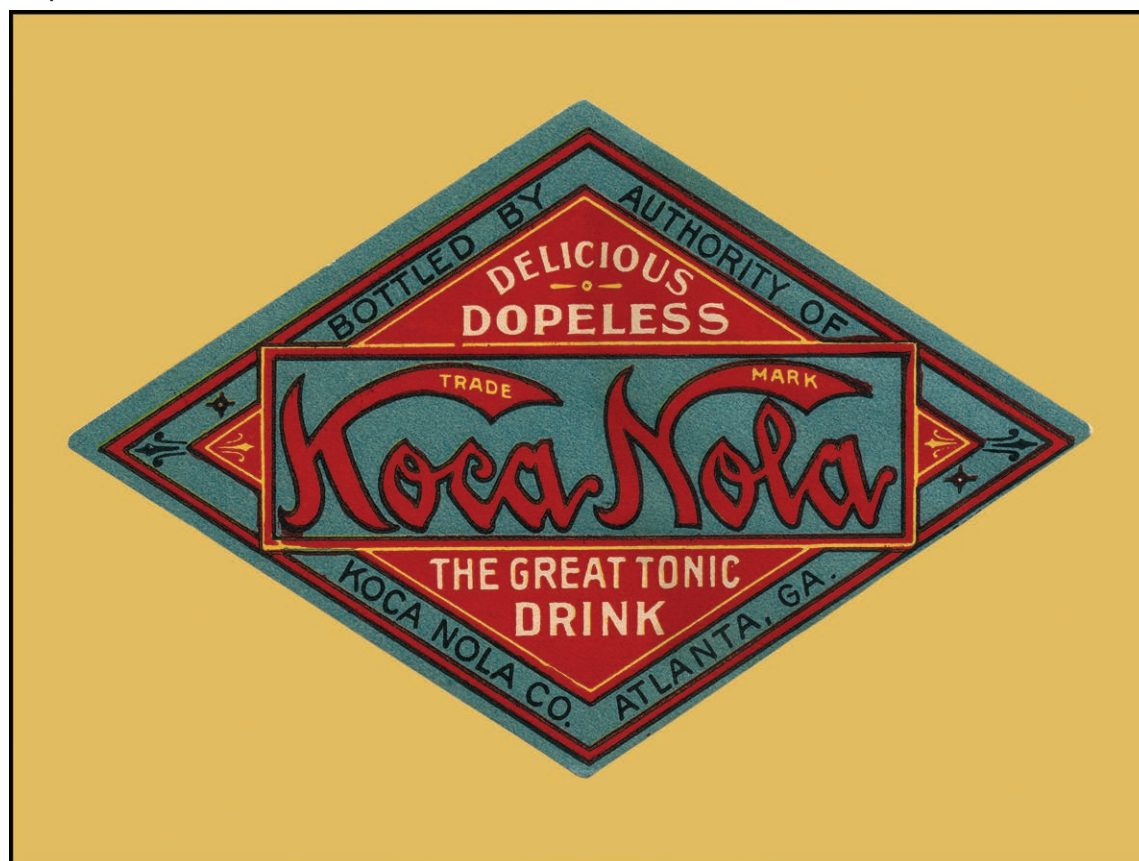

Because it had been widely used in soft drinks in the 1890s, cocaine gained rapid acceptance as a local anesthetic. In 1904 Thomas H. Austin founded the Koca Nola Company, a soft-drink firm that produced copycat cocaine-laced beverages in Atlanta, the hometown of the largest cola company in the world at that time. By 1907 the Koca Nola diamond logo (above) had been trademarked. On the diamond, Koca Nola is touted as “The Great Tonic” that is not only “Delicious” but “Dopeless.” Unfortunately for the beverage company, federal chemists isolated cocaine in a jug of their Koca Nola. Consequently, in March of 1910, the United States Department of Agriculture published its “Notice of Judgment” that Koca Nola had violated the 1906 Food and Drugs Act by “Adulteration and Misbranding” its beverage, which, yes, still contained cocaine. Although its logo was “dopeless,” apparently Koca Nola was not. Bankrupt by 1910, the Koca Nola Company did not completely disappear until 8 yr later. (Copyright © the American Society of Anesthesiologists’ Wood Library-Museum of Anesthesiology.)

George S. Bause, M.D., M.P.H., *Honorary Curator and Laureate of the History of Anesthesia, Wood Library-Museum of Anesthesiology, Schaumburg, Illinois, and Clinical Associate Professor, Case Western Reserve University, Cleveland, Ohio.* [UJYC@aol.com](mailto:UJYC@aol.com).
